# Supplementary material
Source: PubMed Central journal article supplement (PMC7512457)
Supplement: ao0c00417_si_001.pdf [file ao0c00417_si_001.pdf]

## Supporting Information

# Unique non-enzymatic glucose sensor using hollow shelled triple oxide Mn-Cu-Al nanocomposite

Nivedhini Iswarya Chandrasekaran <sup>a</sup>, Manickam Matheswaran <sup>b\*</sup>

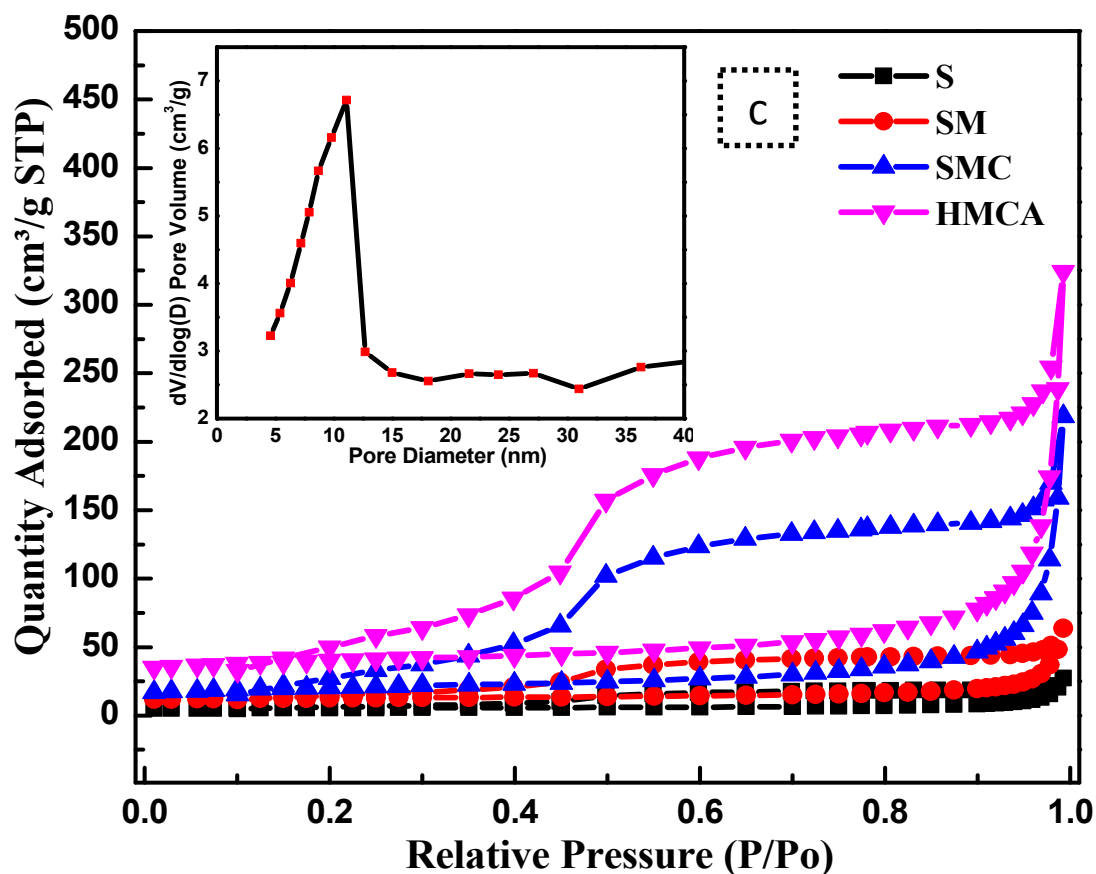

**Figure S1:** N<sub>2</sub> sorption isotherm of synthesized materials (S, SM, SMC, HMCA) and the inset shows pore size distribution plot of HMCA nanocomposites

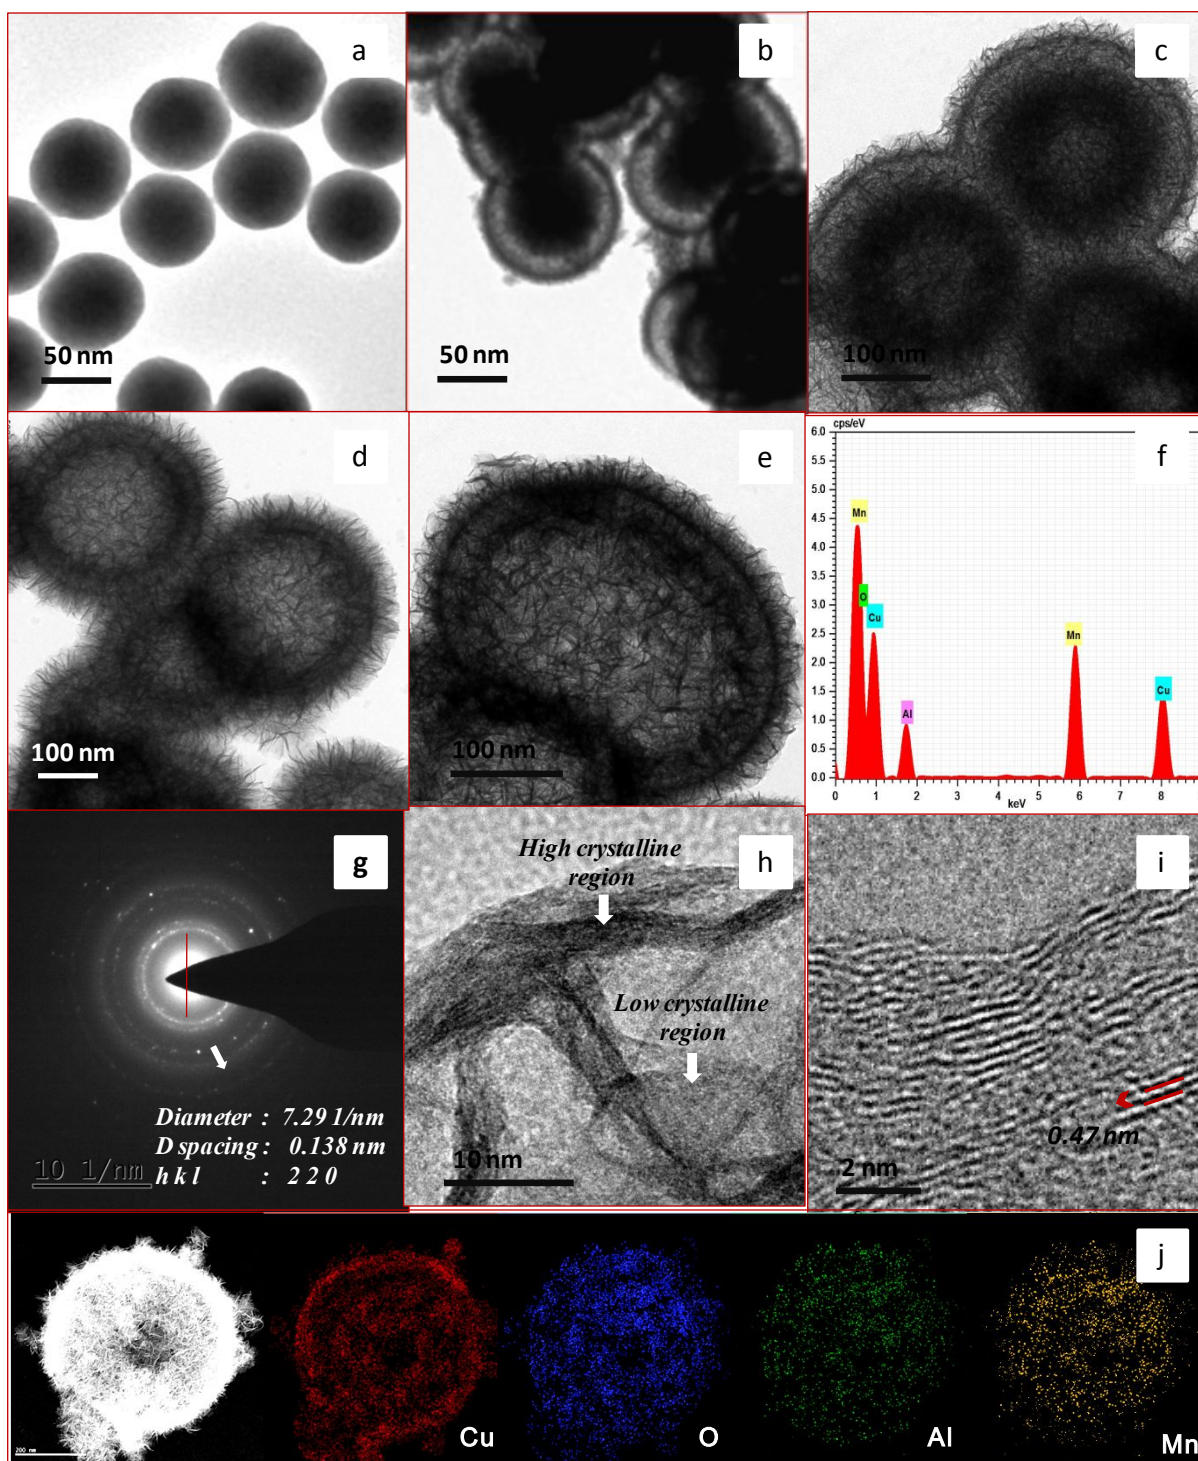

**Figure S2:** TEM images of S (a), SM (b), SMC (c) and HMCA (d and e). EDS Spectra (f), SAED pattern (g), HR-TEM images ((h) and (i)) of HMCA nanocomposites. (j) STEM image of HMCA to be analyzed for EDS mapping.

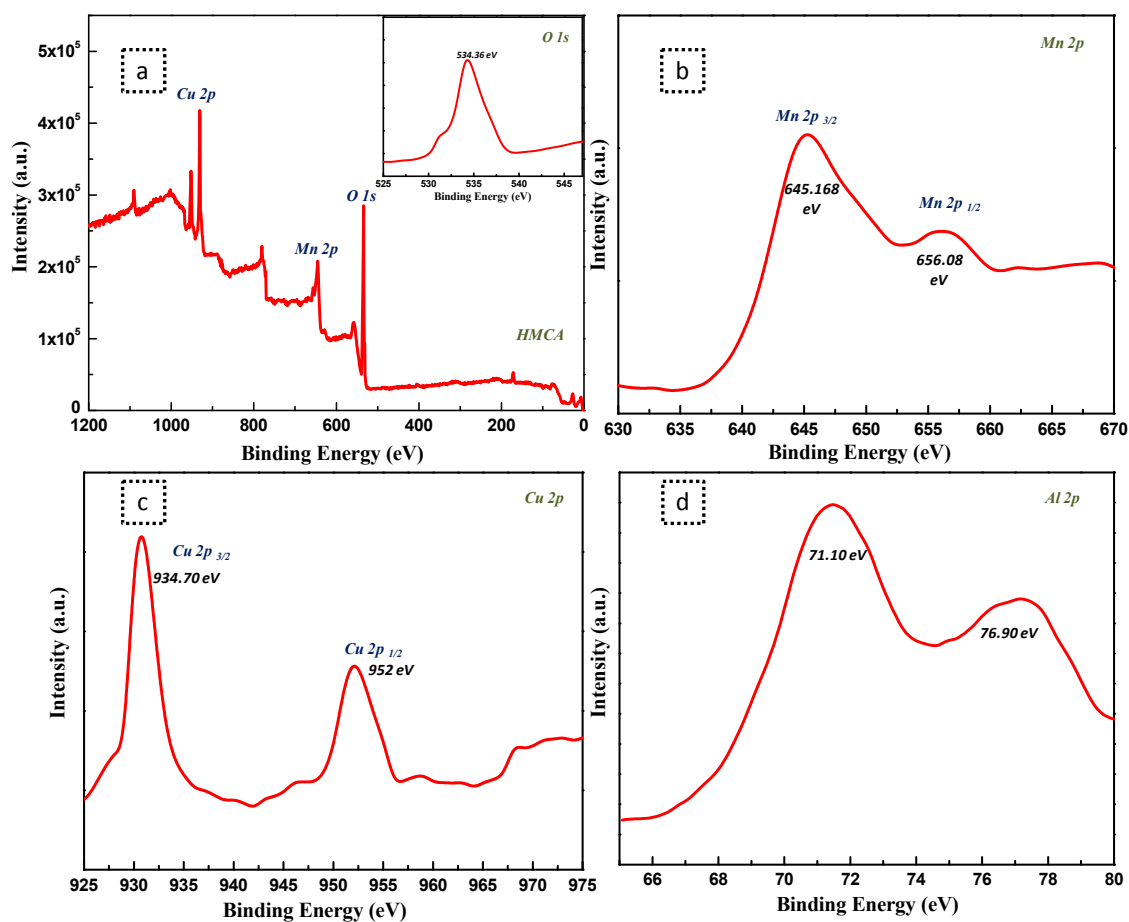

**Figure S3:** (a) XPS survey spectrum of HMCA nanocomposites with high-resolution scan of O 1s (inset). High-resolution scan of (b) Mn 2p, (c) Cu 2p, and (d) Al 2p of HMCA nanocomposites.
